# Supplementary material for: The Working Alliance as a Mediator Between Fidelity to Strengths Model Case Management and Client Outcomes
Source: Atypon-hosted journal article supplement (doi:10.1176/appi.ps.202100387), 2022-05-03
Supplement: appi.ps.202100387.ds001.pdf [file appi.ps.202100387.ds001.pdf]

## Strengths Model Fidelity Scale

| <b>Domain 1. Caseload Ratios</b>                              |                                                          |        |        |        |             |
|---------------------------------------------------------------|----------------------------------------------------------|--------|--------|--------|-------------|
|                                                               | 1                                                        | 2      | 3      | 4      | 5           |
| 1) Average caseload size for the team.                        | $\geq 32$                                                | 28-31  | 24-27  | 20-23  | $\leq 19$   |
| <b>Domain 2. Community Contact</b>                            |                                                          |        |        |        |             |
|                                                               | 1                                                        | 2      | 3      | 4      | 5           |
| 2) Percentage of client contact that occurs in the community. | $\leq 49\%$ or<br>information<br>cannot be<br>determined | 50-64% | 65-74% | 75-84% | $\geq 85\%$ |

| <b>Domain 3. Strengths-Based Group Supervision</b>                                                                                                                                                          |                                           |                                               |                                                    |                              |                                                    |
|-------------------------------------------------------------------------------------------------------------------------------------------------------------------------------------------------------------|-------------------------------------------|-----------------------------------------------|----------------------------------------------------|------------------------------|----------------------------------------------------|
|                                                                                                                                                                                                             | 1                                         | 2                                             | 3                                                  | 4                            | 5                                                  |
| 3a) Group supervision occurs once a week lasting between 90 minutes and 2 hours.                                                                                                                            | Does not occur                            | < 1 hour per week, or less than once per week | 1 hour, once per week                              | 90 minutes, once per week    | $\geq 2$ hours, once per week                      |
| 3b) Group supervision focuses primarily on discussion of clients rather than administrative tasks.                                                                                                          | $\leq 40\%$ client-focused                | 41-50% client-focused                         | 51-69% client-focused                              | 70-79% client-focused        | $\geq 80\%$ client-focused                         |
| 3c) A specific set of clients are presented using the formal group supervision process.                                                                                                                     | Formal group supervision not used         |                                               | 1 client presented                                 | 2 clients presented          | $\geq 3$ clients presented                         |
| 3d) Strengths Assessments are distributed to each team member for all presentations.                                                                                                                        | Never                                     |                                               | Occasionally                                       |                              | Always                                             |
| 3e) The direct service worker clearly states the client's goal(s) during the presentation.                                                                                                                  | Never                                     |                                               | Occasionally                                       |                              | Always                                             |
| 3f) The direct service worker clearly states what they want help with from the group during the presentation.                                                                                               | Never                                     |                                               | Occasionally                                       |                              | Always                                             |
| 3g) The team asks constructive questions based on the client's Strengths Assessment during the presentation.                                                                                                | No questions are based on the client's SA |                                               | Minority of questions are based on the client's SA |                              | Majority of questions are based on the client's SA |
| 3h) The team brainstorms constructive suggestions related to the Strengths Assessment to help the client achieve their goal or help the direct service worker engage with the client and/or develop a goal. | 0-4 ideas per presentation                | 5-9 ideas per presentation                    | 10-14 ideas per presentation                       | 15-19 ideas per presentation | $\geq 20$ ideas per presentation                   |

|                                                                                                                                                                                                                                                                                                                                        |                                                                            |  |                                                                         |  |                                                                                |
|----------------------------------------------------------------------------------------------------------------------------------------------------------------------------------------------------------------------------------------------------------------------------------------------------------------------------------------|----------------------------------------------------------------------------|--|-------------------------------------------------------------------------|--|--------------------------------------------------------------------------------|
| <p>3i) At the end of each presentation, the presenting staff person will:</p> <ul style="list-style-type: none"><li>• State when they will see the person next or their plan to contact the person (and)</li><li>• State what ideas they will present to the person or what strategy they will use to engage with the person</li></ul> | <p>No plan, next steps, or strategy clearly stated in any presentation</p> |  | <p>Clear plan, next steps, or strategy stated in some presentations</p> |  | <p>Clear plan, next steps, or strategy clearly stated in all presentations</p> |
|----------------------------------------------------------------------------------------------------------------------------------------------------------------------------------------------------------------------------------------------------------------------------------------------------------------------------------------|----------------------------------------------------------------------------|--|-------------------------------------------------------------------------|--|--------------------------------------------------------------------------------|

| <b>Domain 4. Supervisor</b>                                                                                                                                                                                                      |             |               |               |                |          |
|----------------------------------------------------------------------------------------------------------------------------------------------------------------------------------------------------------------------------------|-------------|---------------|---------------|----------------|----------|
|                                                                                                                                                                                                                                  | 1           | 2             | 3             | 4              | 5        |
| 4a) Supervisor spends at least 2 hours per week providing a quality review of tools related to the Strengths Model (i.e. Strengths Assessments and Personal Recovery Plans) and integration of these tools into actual practice. | ≤29 minutes | 30-59 minutes | 60-89 minutes | 90-119 minutes | ≥2 hours |
| 4b) Supervisor spends at least 2 hours per week giving direct service workers specific and structured feedback on skills/tools related to the Strengths Model of case management.                                                | ≤29 minutes | 30-59 minutes | 60-89 minutes | 90-119 minutes | ≥2 hours |
| 4c) Supervisor spends at least 2 hours per week providing field mentoring for direct service workers.                                                                                                                            | ≤29 minutes | 30-59 minutes | 60-89 minutes | 90-119 minutes | ≥2 hours |
| 4d) Ratio of direct service workers to supervisor.                                                                                                                                                                               | ≥9:1        | 8:1           | 7:1           | 6:1            | ≤5:1     |

| <b>Domain 5. Strengths Assessment</b>                                                                                                                                   |                                                      |                                                       |                                                       |                                                       |                                                        |
|-------------------------------------------------------------------------------------------------------------------------------------------------------------------------|------------------------------------------------------|-------------------------------------------------------|-------------------------------------------------------|-------------------------------------------------------|--------------------------------------------------------|
|                                                                                                                                                                         | 1                                                    | 2                                                     | 3                                                     | 4                                                     | 5                                                      |
| 5a) There is evidence that the Strengths Assessment (SA) is used regularly in practice.                                                                                 | ≤ 60% used and updated at least monthly              | 61-70% used and updated at least monthly              | 71-80% used and updated at least monthly              | 81-90% used and updated at least monthly              | 91-100% used and updated at least monthly              |
| 5b) Client interests and/or aspirations are identified with detail and specificity.                                                                                     | ≤ 60% identified at least 3                          | 61-70% identified at least 3                          | 71-80% identified at least 3                          | 81-90% identified at least 3                          | 91-100% identified at least 3                          |
| 5c) Client language is used (e.g. “I want more friends” rather than “increase socialization skills”) and it is clear that the client was involved in developing the SA. | ≤ 60% demonstrate predominant use of client language | 61-70% demonstrate predominant use of client language | 71-80% demonstrate predominant use of client language | 81-90% demonstrate predominant use of client language | 91-100% demonstrate predominant use of client language |
| 5d) Talents and/or skills are listed on the SA in some detail and specificity.                                                                                          | ≤ 60% identified at least 6                          | 61-70% identified at least 6                          | 71-80% identified at least 6                          | 81-90% identified at least 6                          | 91-100% identified at least 6                          |
| 5e) Environmental strengths are listed on the SA in some detail and specificity.                                                                                        | ≤ 60% identified at least 6                          | 61-70% identified at least 6                          | 71-80% identified at least 6                          | 81-90% identified at least 6                          | 91-100% identified at least 6                          |
| 5f) Percent of clients who have a Strengths Assessment.                                                                                                                 | ≤ 60%                                                | 61-70%                                                | 71-80%                                                | 81-90%                                                | 91-100%                                                |

| <b>Domain 6. Integration of Strengths Assessment with Treatment Plan</b>      |                                                       |                                                        |                                                        |                                                        |                                                         |
|-------------------------------------------------------------------------------|-------------------------------------------------------|--------------------------------------------------------|--------------------------------------------------------|--------------------------------------------------------|---------------------------------------------------------|
|                                                                               | 1                                                     | 2                                                      | 3                                                      | 4                                                      | 5                                                       |
| 6) Strengths Assessment is used to help clients develop treatment plan goals. | ≤ 60% of treatment plan goals link directly to the SA | 61-70% of treatment plan goals link directly to the SA | 71-80% of treatment plan goals link directly to the SA | 81-90% of treatment plan goals link directly to the SA | 91-100% of treatment plan goals link directly to the SA |

| <b>Domain 7. Personal Recovery Plan</b>                                                                                                                                    |                                      |                                                 |                                                  |                                                  |                                                 |
|----------------------------------------------------------------------------------------------------------------------------------------------------------------------------|--------------------------------------|-------------------------------------------------|--------------------------------------------------|--------------------------------------------------|-------------------------------------------------|
|                                                                                                                                                                            | 1                                    | 2                                               | 3                                                | 4                                                | 5                                               |
| 7a) Agency uses the Personal Recovery Plan (PRP) as a tool for helping clients achieve goals.                                                                              | Not used                             | 1-25% of clients used a PRP in the last 90 days | 26-50% of clients used a PRP in the last 90 days | 51-75% of clients used a PRP in the last 90 days | ≥ 76% of clients used a PRP in the last 90 days |
| <b>*Only rate items 7b through 7e if the agency stated they use the Personal Recovery Plan; otherwise, the rating for 7a will serve as the final rating for this item.</b> |                                      |                                                 |                                                  |                                                  |                                                 |
| 7b) Goals on the PRP should use the client's own language, the actual passion statement, and state why the goal is important to the person.                                | ≤ 44% of goals use client's language | 45-59% of goals use client's language           | 60-74% of goals use client's language            | 75-89% of goals use client's language            | ≥ 90% of goals use client's language            |

Online supplement for 10.1176/appi.ps.202100387

|                                                                                       |                                                             |                                                              |                                                              |                                                              |                                                             |
|---------------------------------------------------------------------------------------|-------------------------------------------------------------|--------------------------------------------------------------|--------------------------------------------------------------|--------------------------------------------------------------|-------------------------------------------------------------|
| 7c) Long-term goal on the PRP is broken down into smaller, measurable steps.          | ≤ 44% of steps on the PRP are broken down and measurable    | 45-59% of steps on the PRP are broken down and measurable    | 60-74% of steps on the PRP are broken down and measurable    | 75-89% of steps on the PRP are broken down and measurable    | ≥ 90% of steps on the PRP are broken down and measurable    |
| 7d) Specific and varying target dates are set for each step on the PRP.               | ≤ 44% of dates on the PRP are specific and have variation   | 45-59% of dates on the PRP are specific and have variation   | 60-74% of dates on the PRP are specific and have variation   | 75-89% of dates on the PRP are specific and have variation   | ≥ 90% of dates on the PRP are specific and have variation   |
| 7e) There is evidence that PRPs are used during nearly every contact with the client. | ≤ 44% of PRPs are used nearly every contact with the client | 45-59% of PRPs are used nearly every contact with the client | 60-74% of PRPs are used nearly every contact with the client | 75-89% of PRPs are used nearly every contact with the client | ≥ 90% of PRPs are used nearly every contact with the client |

| <b>Domain 8. Naturally Occurring Resources</b>                                                                                      |                                                                                                                       |                                                                                                                        |                                                                                                                        |                                                                                                                        |                                                                                                                       |
|-------------------------------------------------------------------------------------------------------------------------------------|-----------------------------------------------------------------------------------------------------------------------|------------------------------------------------------------------------------------------------------------------------|------------------------------------------------------------------------------------------------------------------------|------------------------------------------------------------------------------------------------------------------------|-----------------------------------------------------------------------------------------------------------------------|
|                                                                                                                                     | 1                                                                                                                     | 2                                                                                                                      | 3                                                                                                                      | 4                                                                                                                      | 5                                                                                                                     |
| 8a) Direct service workers help clients access naturally occurring resources to help people achieve goals.                          | ≤ 10% of goals have evidence of the direct service worker helping to access at least one naturally occurring resource | 11-25% of goals have evidence of the direct service worker helping to access at least one naturally occurring resource | 26-40% of goals have evidence of the direct service worker helping to access at least one naturally occurring resource | 41-75% of goals have evidence of the direct service worker helping to access at least one naturally occurring resource | ≥ 76% of goals have evidence of the direct service worker helping to access at least one naturally occurring resource |
| 8b) Direct service workers use more naturally occurring resources than formal mental health resources to help people achieve goals. | ≤ 10% of goals clearly reflect a trend toward the use of naturally occurring resources                                | 11-25% of goals clearly reflect a trend toward the use of naturally occurring resources                                | 26-40% of goals clearly reflect a trend toward the use of naturally occurring resources                                | 41-75% of goals clearly reflect a trend toward the use of naturally occurring resources                                | ≥ 76% of goals clearly reflect a trend toward the use of naturally occurring resources                                |



| <b>Domain 9. Hope Inducing Practice</b>                                                                                                     |                                                                                                                |                                                                                                     |                                                                                                                |                                                                                                                        |                                                                                                                                                                                          |
|---------------------------------------------------------------------------------------------------------------------------------------------|----------------------------------------------------------------------------------------------------------------|-----------------------------------------------------------------------------------------------------|----------------------------------------------------------------------------------------------------------------|------------------------------------------------------------------------------------------------------------------------|------------------------------------------------------------------------------------------------------------------------------------------------------------------------------------------|
|                                                                                                                                             | 1                                                                                                              | 2                                                                                                   | 3                                                                                                              | 4                                                                                                                      | 5                                                                                                                                                                                        |
| 9a) Direct service workers' interactions with people are directed toward movement on a goal that is meaningful and important to the person. | Direct service worker actively detracts from movement on a goal that is meaningful and important to the person | Direct service worker discourages movement on a goal that is meaningful and important to the person | Direct service worker is neutral relative to movement on a goal that is meaningful and important to the person | Direct service worker is accepting and supportive of movement on a goal that is meaningful and important to the person | Direct service worker actively contributes to movement on a goal that is meaningful and important to the person                                                                          |
| 9b) Direct service workers' interactions with people are directed toward expanding the person's autonomy and choice.                        | Direct service worker actively detracts from or denies client's perception of choice or control                | Direct service worker discourages client's perception of choice or responds to it superficially     | Direct service worker is neutral relative to client autonomy and choice                                        | Direct service worker is accepting and supportive of client autonomy                                                   | Direct service worker adds significantly to the feeling and meaning of client's expression of autonomy in such a way as to markedly expand client's experience of own control and choice |

## Team Fidelity Ratings over Time

| <b>Team</b> | <b>Baseline</b> | <b>6 months</b> | <b>12 months</b> | <b>18 months</b> | <b>24 months</b> | <b>36 months</b> |
|-------------|-----------------|-----------------|------------------|------------------|------------------|------------------|
| <b>A.1</b>  | 17.94           | 21.81           | 21.26            | 33.19            | 22.03            | 31.58            |
| <b>A.2</b>  | 24.57           | 27.67           | 30.93            | 30.02            | 30.86            | 31.88            |
| <b>B</b>    | 24.81           | 29.03           | 31.06            | 34.29            | 33.01            | 34.11            |
| <b>C</b>    | 23.63           | 29.54           | 32.22            | 37.07            | 36.29            | 37.07            |
| <b>D</b>    | 14.00           | 17.22           | 22.64            | 18.42            |                  |                  |
| <b>E.1</b>  | 14.50           | 18.61           | 25.98            | 23.80            | 26.76            | 33.49            |
| <b>E.2</b>  | 14.50           | 19.61           | 27.42            | 27.72            | 25.55            | 32.02            |
| <b>E.3</b>  | 15.50           | 22.01           | 27.48            | 29.04            | 29.16            | 31.24            |
| <b>E.4</b>  |                 |                 | 28.00            | 26.67            | 26.96            | 30.97            |
| <b>E.5</b>  | 31.07           | 29.47           |                  |                  |                  |                  |
| <b>F.1</b>  | 19.50           | 27.66           | 28.59            | 27.13            | 28.22            | 31.02            |
| <b>F.2</b>  | 14.50           | 26.59           | 29.91            | 28.39            | 26.05            | 32.03            |
| <b>F.3</b>  | 24.84           | 29.33           | 28.39            | 28.37            | 26.82            | 30.57            |
| <b>G</b>    | 27.85           | 34.40           | 37.40            | 32.71            | 34.60            | 36.49            |

*Notes.* Total fidelity scores are presented for each team and time point, for the seven sites (A to G). Total scores can range from 8 to 40. A score of 32 or higher indicated high fidelity. Domain scores were the mean of that domain's items. Domain scores were summed for a total fidelity rating (based on 8 domains since Domain 6 was excluded). Site D dropped out of the study early; hence, fidelity scores are missing for 24 months and 36 months. In Site E, the teams were re-organized in the middle of the study; hence, missing fidelity assessments for some Site E teams.
